# Supplementary material for: Anti-diabetic Effects of Clostridium butyricum CGMCC0313.1 through Promoting the Growth of Gut Butyrate-producing Bacteria in Type 2 Diabetic Mice
Source: PubMed Central journal article supplement (PMC5539151; doi:10.1038/s41598-017-07335-0), 2017-08-01
Supplement: 41598_2017_7335_MOESM1_ESM.pdf [file 41598_2017_7335_MOESM1_ESM.pdf]

**Supplementary Information: Anti-diabetic effects of *Clostridium butyricum* CGMCC0313.1 through promoting the growth of gut butyrate-producing bacteria in Type 2 Diabetic Mice**

Lingling Jia<sup>1,2</sup>, Dongyao Li<sup>1</sup>, Ninghan Feng<sup>2,3</sup>, Muhammad Shamoony<sup>1</sup>, Zhenghua Sun<sup>1</sup>, Lei Ding<sup>4</sup>, Hao Zhang<sup>1</sup>, Wei Chen<sup>1</sup>, Jia Sun<sup>1\*</sup> & Yong Q Chen<sup>1,2,5\*</sup>

<sup>1</sup>State Key Laboratory of Food Science and Technology, School of Food Science and Technology, Jiangnan University, Wuxi 214122, P. R. China.

<sup>2</sup>Wuxi School of Medicine, Jiangnan University, Wuxi 214122, Jiangsu, P. R. China.

<sup>3</sup>Wuxi No. 2 Hospital, Jiangsu, P. R. China.

<sup>4</sup>Department of Biology and Chemistry, University Bremen. Leobener Str., NW 2, 28359 Bremen, Germany.

<sup>5</sup>Department of Cancer Biology, Wake Forest School of Medicine, Winston-Salem, NC 27157, USA

\*Corresponding authors: State Key Laboratory of Food Science and Technology,

School of Food Science and Technology, E-mail: [jiasun@jiangnan.edu.cn](mailto:jiasun@jiangnan.edu.cn) or Wuxi

School of Medicine, Jiangnan University, Wuxi 214122, P. R. China. E-mail:

[yqchen@jiangnan.edu.cn](mailto:yqchen@jiangnan.edu.cn). Tel/Fax: +86 (0)510 85197370.

**Supplementary Table S1-Rodent Diet with 60% kcal fat (D12492)**

| Product                | gm%     | kcal% |
|------------------------|---------|-------|
| Protein                | 26.2    | 20    |
| Carbohydrate           | 26.3    | 20    |
| Fat                    | 34.9    | 60    |
|                        | Total   | 100   |
|                        | kcal/gm | 5.24  |
| Ingredient             | gm      | kcal  |
| Casein, 80 Mesh        | 200     | 800   |
| L-Cystine              | 3       | 12    |
| Corn Starch            | 0       | 0     |
| Maltodextrin 10        | 125     | 500   |
| Sucrose                | 68.8    | 275.2 |
| Cellulose, BW200       | 50      | 0     |
| Soybean Oil            | 25      | 225   |
| Lard*                  | 245     | 2205  |
| Mineral Mix, S10026    | 10      | 0     |
| DiCalcium Phosphate    | 13      | 0     |
| Calcium Carbonate      | 5.5     | 0     |
| Potassium Citrate1 H2O | 16.5    | 0     |
| Vitamin Mix, V10001    | 10      | 40    |
| Choline Bitartrate     | 2       | 0     |

|                  |        |      |
|------------------|--------|------|
| FD&C Blue Dye #1 | 0.05   | 0    |
| Total            | 773.85 | 4057 |

**Supplementary Table S2-Primer sequences used in this study for gene expression and microbial abundance**

| Gene name                              | Gene symbol    | Sequence                              |
|----------------------------------------|----------------|---------------------------------------|
| <i>butyrate kinase</i>                 | <i>buk</i>     | Buk-5F1 CCATGCATTAAATCAAAAAGC         |
| <i>gene</i>                            |                | Buk-5F2 CCATGCGTTAAACCAAAAAGC         |
|                                        |                | Buk-6R1 AGTACCTCCACCCATGTG            |
|                                        |                | Buk-6R2 AATACCTCCGCCCATATG            |
|                                        |                | Buk-6R3 AATACCGCCRCCCATATG            |
| Total bacteria                         | Total          | Forward5' - GCAGGCCTAACACATGCAAGTC    |
|                                        |                | Reverse 5'-CTGCTGCCTCCCGTAGGAGT       |
| <i>butyryl-coenzyme A</i>              | <i>but-CoA</i> | Forward5'-GCIGAICATTTACITGGAAYWSITGGC |
| <i>gene</i>                            |                | AYATG                                 |
|                                        |                | Reverse 5'-CCTGCCTTTGCAATRTCIACRAANGC |
| Clostridium                            | CB0313.1       | Forward5'-CCTCCTTTCTATGGAGAAATCTAGCA  |
| butyrate                               |                | Reverse 5'-TGTAGCTTGACCTTTTTAAGTTTTGA |
| CGMCC0313.1                            |                |                                       |
| <i>Free fatty acid receptor type 1</i> | <i>Ffar1</i>   | Forward 5'-CCTTCGCTCTCTATGTATCTGCC-3' |
|                                        |                | Reverse 5'-CGCAGTTTAGCGTGGGACA-3'     |

---

|                                        |              |                                         |
|----------------------------------------|--------------|-----------------------------------------|
| <i>Free fatty acid receptor type 2</i> | <i>Ffar2</i> | Forward 5'-ATCCTCCTGCTTAATCTGACCC-3'    |
|                                        |              | Reverse 5'-CGCACACGATCTTTGGTAGGT-3'     |
| <i>Free fatty acid receptor type 3</i> | <i>Ffar3</i> | Forward 5'-CTTCTTTCTTGGCAATTACTGGC-3'   |
|                                        |              | Reverse 5'-CCGAAATGGTCAGGTTTAGCAA-3'    |
| <i>Glp-1 receptor</i>                  | <i>Glp1R</i> | Forward 5'-ACGGTGTCCCTCTCAGAGAC-3'      |
|                                        |              | Reverse 5'-ATCAAAGGTCCGGTTGCAGAA-3'     |
| Bacteroidetes                          | Bac          | Forward 5'-GAAGGTCCCCCACATTG-3'         |
|                                        |              | Reverse 5'-CAATCGGAGTTCTTCGTG-3'        |
| Firmicutes                             | Firm         | Forward                                 |
|                                        |              | 5'-GGAGYATGTGGTTTAATTCGAAGCA-3'         |
|                                        |              | Reverse 5'-AGCTGACGACAACCATGCAC-3'      |
| Lactobacilli                           | Lac          | Forward 5'-AGCAGTAGGGAATCTTCCA-3'       |
|                                        |              | Reverse 5'-CACCGCTACACATGGAG-3'         |
| Bifidobacteria                         | Bifid        | Forward 5'-GCGTGCTTAACACATGCAAGTC-3'    |
|                                        |              | Reverse 5'-CACCCGTTTCCAGGAGCTATT-3'     |
| Universal                              | Univ         | Forward 5'-TCCTACGGGAGGCAGCAGT-3'       |
|                                        |              | Reverse 5'-GACTACCAGGGTATCTAATCCTGTT-3' |
| Clostridial cluster XIVa               | XIVa         | Forward5'- CGGTACCTGACTAAGAAGC          |
|                                        |              | Reverse 5'-AGTTYATTCTTGCGAACG           |
| Clostridial cluster IV                 | IV           | Forward5'-TTA CTG GGT GTA AAG GG        |
|                                        |              | Reverse 5'-TAG AGT GCT CTT GCG TA       |
| <i>β-actin</i>                         |              | Forward5'-CCCAGGCATTGCTGACAGG           |

---

---

|               |                                  |
|---------------|----------------------------------|
|               | Reverse 5'-TGAAGGTGGACAGTGAGGC   |
| <i>Cramp</i>  | Forward5'-CTTCAAGGAACAGGGGGTGG   |
|               | Reverse 5'-CTTGAACCGAAAGGGCTGTG  |
| <i>G6pase</i> | Forward5'-ATGGAGGAAGGAATGAACAT   |
|               | Reverse 5'-TGGGAGTCTTGGTAATTCAC  |
| <i>Pck1</i>   | Forward5'-GAGGAGCTGTTTGGGATCTC   |
|               | Reverse 5'-TTGACCTGGTCCTCCAGATA  |
| <i>Glut1</i>  | Forward5'- GCAGAGGCTTGCTTGTAGAG  |
|               | Reverse 5'- AACGGACGCGCTGTAACAT  |
| <i>Glut4</i>  | Forward5'- CTCATTCTTGGACGGTTCCT  |
|               | Reverse 5'- GCGATTTCTCCCACATACAT |
| <i>Ucp-1</i>  | Forward5'- AAACAGAAGGATTGCCGAAA  |
|               | Reverse 5'- AATCCTGAGTGAGGCAAAGC |
| <i>Acc1</i>   | Forward5'- TGTCCGCACTGACTGTAACC  |
|               | Reverse 5'- ATGCTCCGCACAGATTCTTC |
| <i>Gk</i>     | Forward5'- GCAGAAGGGAACAACATCGT  |
|               | Reverse 5'- ATTGCCACCACATCCATCTC |

---

**Supplementary Table S3-The alteration of feces microbiota composition measured by metagenome.**

Values presented here are mean  $\pm$  SD (n=5-6). #, ##, ### different in comparison with HFD by One-way ANOVA followed by the indicated post hoc test. \*, \*\*,\*\*\*,

different in comparison with HFD by *t* tests.

| Taxa (%)              | HFD          | CB                         | NaB           | ND                          |
|-----------------------|--------------|----------------------------|---------------|-----------------------------|
| <b>Phylum</b>         |              |                            |               |                             |
| Bacteroidetes         | 5.68 ± 1.38  | 16.42 ± 4.19*              | 6.97 ± 4.57   | 48.68 ± 6.16 <sup>###</sup> |
| Firmicutes            | 88.42 ± 8.16 | 72.78 ± 13.39 <sup>#</sup> | 86.82 ± 5.83  | 47.90 ± 8.07 <sup>###</sup> |
| <b>Class</b>          |              |                            |               |                             |
| Bacteroidia           | 5.68 ± 1.36  | 16.48 ± 13.46*             | 6.96 ± 4.57   | 48.63 ± 8.89 <sup>###</sup> |
| Bacilli               | 5.96 ± 4.71  | 8.72 ± 7.72                | 11.57 ± 4.11  | 17.68 ± 6.90                |
| Clostridia            | 32.97 ± 3.73 | 56.53 ± 16.69*             | 41.30 ± 14.64 | 25.50 ± 7.57*               |
| Erysipelotrichi       | 48.67 ± 5.03 | 6.67 ± 4.27 <sup>###</sup> | 32.87 ± 2.67  | 4.35 ± 10.21 <sup>###</sup> |
| Epsilonproteobacteria | 0.28 ± 0.29  | 3.66 ± 3.38                | 1.46 ± 2.55   | 0.81 ± 0.82                 |
| <b>Order</b>          |              |                            |               |                             |
| Coriobacteriales      | 2.02 ± 3.58  | 0.78 ± 2.51                | 1.46 ± 0.70   | 0.84 ± 1.22 <sup>###</sup>  |
| Bacteroidales         | 5.68 ± 1.34  | 16.41 ± 4.09               | 6.96 ± 4.22   | 48.63 ± 5.32 <sup>###</sup> |
| Lactobacillales       | 5.44 ± 4.74  | 8.29 ± 7.76                | 11.43 ± 4.18  | 12.79 ± 6.88                |
| Clostridiales         | 32.95 ± 3.33 | 56.53 ± 13.44*             | 41.29 ± 12.02 | 25.45 ± 7.57                |
| Erysipelotrichales    | 48.67 ± 5.03 | 6.76 ± 4.27 <sup>###</sup> | 32.87 ± 2.67* | 4.35 ± 10.21 <sup>###</sup> |
| <b>Family</b>         |              |                            |               |                             |
| Coriobacteriaceae     | 3.15 ± 2.96  | 0.88 ± 0.69                | 1.37 ± 0.78   | 1.12 ± 1.22                 |
| Bacteroidaceae        | 0.53 ± 0.39  | 1.68 ± 0.99 <sup>#</sup>   | 0.75 ± 0.49   | 0.58 ± 0.28                 |
| Porphyromonadaceae    | 7.48 ± 4.22  | 9.42 ± 8.08                | 7.43 ± 3.69   | 14.66 ± 6.88                |

ae

|                     |              |                            |               |                             |
|---------------------|--------------|----------------------------|---------------|-----------------------------|
| Lachnospiraceae     | 6.97 ± 1.22  | 12.57 ± 4.18 <sup>#</sup>  | 8.59 ± 4.52   | 6.32 ± 2.40                 |
| Ruminococcaceae     | 8.72 ± 2.23  | 16.58 ± 36.30*             | 15.03 ± 6.24* | 3.46 ± 1.28**               |
| Rikenellaceae       | 1.37 ± 0.31  | 3.64 ± 3.10                | 2.55 ± 3.14   | 14.28 ± 6.57 <sup>###</sup> |
| Deferribacteraceae  | 0.15 ± 0.12  | 1.18 ± 1.49                | 0.82 ± 1.34   | 0.14 ± 0.11                 |
| Lactobacillaceae    | 7.48 ± 4.22  | 9.42 ± 8.08                | 7.43 ± 3.69   | 14.66 ± 6.88                |
| Helicobacteraceae   | 0.37 ± 0.23  | 3.12 ± 3.36                | 2.03 ± 2.44   | 0.86 ± 0.82                 |
| Erysipelotrichaceae | 42.03 ± 7.96 | 8.15 ± 5.07 <sup>###</sup> | 31.60 ± 15.69 | 5.46 ± 4.49 <sup>###</sup>  |

e

|                |             |                          |             |             |
|----------------|-------------|--------------------------|-------------|-------------|
| Clostridiaceae | 0.30 ± 0.00 | 3.98 ± 4.26 <sup>#</sup> | 0.23 ± 0.19 | 0.80 ± 0.55 |
|----------------|-------------|--------------------------|-------------|-------------|

Genus

|                     |              |                            |                           |                             |
|---------------------|--------------|----------------------------|---------------------------|-----------------------------|
| Akkermansia         | 0.66 ± 0.46  | 1.54 ± 1.93                | 0.82 ± 0.66               | 0.24 ± 0.48                 |
| Ruminococcus        | 0.48 ± 0.14  | 1.10 ± 0.38 <sup>#</sup>   | 0.88 ± 0.34 <sup>#</sup>  | 0.30 ± 0.12                 |
| Bacteroides         | 0.62 ± 0.35  | 1.68 ± 0.99 <sup>#</sup>   | 0.75 ± 0.49               | 0.58 ± 0.29                 |
| S24-7               | 2.45 ± 1.00  | 10.05 ± 11.09              | 3.17 ± 1.60               | 38 ± 12.53 <sup>###</sup>   |
| Clostridium         | 0.00 ± 0.00  | 4.43 ± 4.55 <sup>#</sup>   | 0.00 ± 0.00               | 0.50 ± 0.48                 |
| Streptococcus       | 1.27 ± 0.27  | 2.22 ± 1.09                | 2.47 ± 0.54 <sup>##</sup> | 0.12 ± 0.11 <sup>#</sup>    |
| Mucispirillum       | 0.25 ± 0.12  | 1.49 ± 1.49                | 0.70 ± 1.34               | 0.10 ± 0.11                 |
| Oscillospira        | 7.05 ± 1.85  | 12.70 ± 5.38*              | 11.83 ± 5.17*             | 1.80 ± 0.53***              |
| f-Rikenellaceae, g- | 1.32 ± 0.26  | 3.48 ± 3.09                | 2.47 ± 3.07               | 13.90 ± 6.49 <sup>###</sup> |
| Allobaculum         | 48.51 ± 8.02 | 6.44 ± 5.21 <sup>###</sup> | 32.81 ± 15.7              | 4.06 ± 4.28 <sup>###</sup>  |
| Lactobacillus       | 7.42 ± 4.16  | 9.37 ± 8.09                | 7.38 ± 3.68               | 12.49 ± 6.85                |

|               |             |             |              |              |
|---------------|-------------|-------------|--------------|--------------|
| Butyricimonas | 0.10 ± 0.09 | 0.34 ± 0.28 | 0.40 ± 0.21* | 0.22 ± 0.13  |
| Odoribacter   | 0.51 ± 0.29 | 1.83 ± 2.11 | 0.40 ± 0.60  | 1.83 ± 0.95* |

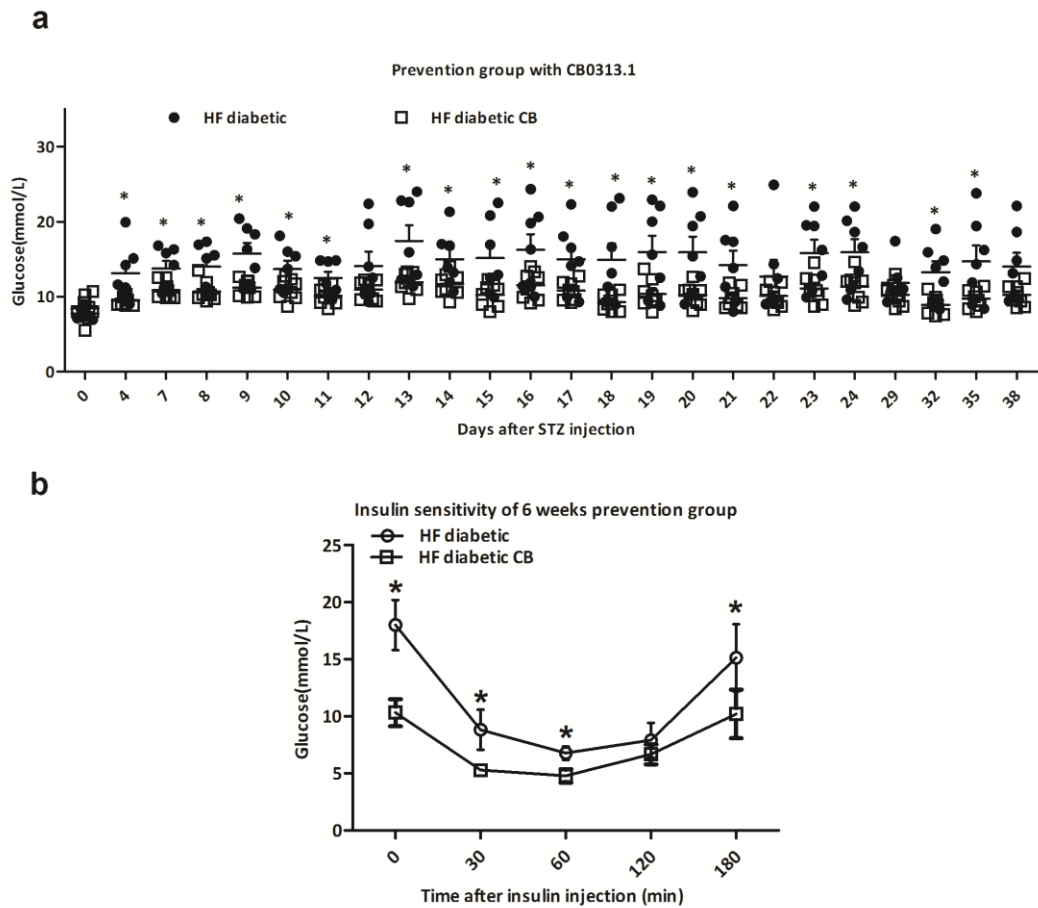

**Figure S1.** CB0313.1 ameliorates glucose homeostasis in HF diabetic mice—the detailed results in 2014. **(a)** Glucose was tested after 6h fasting; **(b)** Insulin tolerance test; *HF diabetic* high fat diet and streptozotocin, *HF diabetic CB* high fat diet and streptozotocin plus CB0313.1. Data are mean ± SEM, (n = 3-8 mice per group). #, ##, ###  $p < 0.05$ ,  $p < 0.01$ ,  $p < 0.001$  vs HF diabetic control by One-way ANOVA followed by the indicated post hoc test. \*, \*\*, \*\*\*  $p < 0.05$ ,  $p < 0.01$ ,  $p < 0.001$  vs HF diabetic control by *t*-test. *HF diabetic*: high fat diet and streptozotocin, *HF diabetic CB*: high fat diet and streptozotocin plus CB0313.1



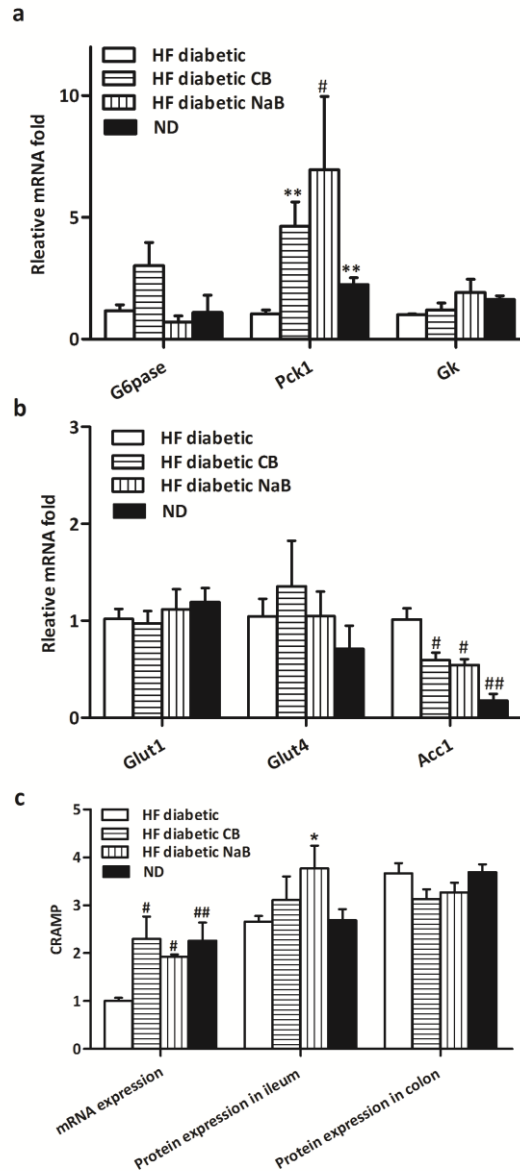

**Figure S2.** CB0313.1 activates intestinal gluconeogenesis and increase cathelicidin related antimicrobial peptide (CRAMP) secretion in ileum in HF diabetic mice. **(a)** *G6pase*, *Pck1* and *Gk* mRNA in colon; **(b)** *Glut1*, *Glut4* and *Acc1* mRNA in colon; **(c)** CRAMP expression at mRNA and protein. *HF diabetic* high fat diet and streptozotocin, *HF diabetic CB* high fat diet and streptozotocin plus CB0313.1, *HF diabetic NaB* *HF diabetic CB* high fat diet and streptozotocin plus NaB, *ND* Normal diet. Data are mean  $\pm$  SEM, (n = 3-12 mice per group). #, ##, ###  $p < 0.05$ ,  $p < 0.01$ ,  $p < 0.001$  vs HF diabetic control by One-way ANOVA followed by the indicated post hoc test. \*, \*\*, \*\*\*  $p < 0.05$ ,  $p < 0.01$ ,  $p < 0.001$  vs HF diabetic control by *t*-test. *HF diabetic*: high fat diet and streptozotocin, *HF diabetic CB*: high fat diet and streptozotocin plus CB0313.1, *HF diabetic NaB*: high fat diet and streptozotocin plus NaB, *ND*: Normal diet.

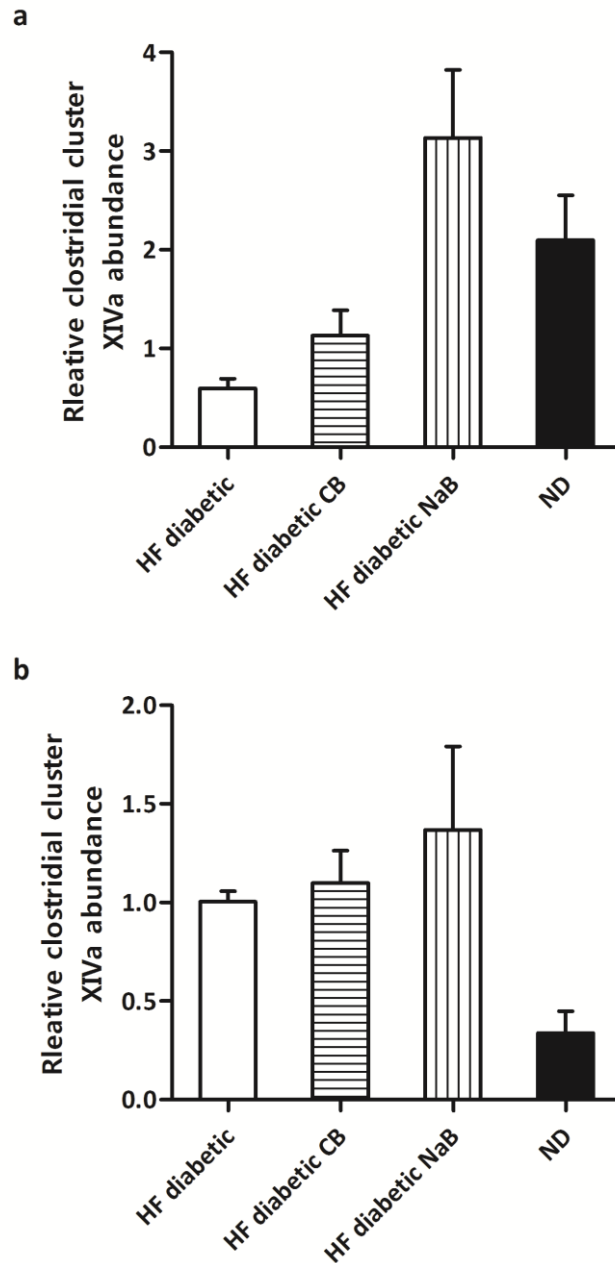

**Figure S3.** (a) Relative clostridial cluster IV abundance; (b) Relative clostridial cluster XIVa abundance. *HF diabetic* high fat diet and streptozotocin, *HF diabetic CB* high fat diet and streptozotocin plus CB0313.1, *HF diabetic NaB* *HF diabetic CB* high fat diet and streptozotocin plus NaB, *ND* Normal diet. Data are mean  $\pm$  SEM, (n = 3-5 mice per group). #, ##, ###  $p < 0.05$ ,  $p < 0.01$ ,  $p < 0.001$  vs HF diabetic control by One-way ANOVA followed by the indicated post hoc test. \*, \*\*, \*\*\*  $p < 0.05$ ,  $p < 0.01$ ,  $p < 0.001$  vs HF diabetic control by *t*-test. *HF diabetic*: high fat diet and streptozotocin, *HF diabetic CB*: high fat diet and streptozotocin plus CB0313.1, *HF diabetic NaB*: high fat diet and streptozotocin plus NaB, *ND*: Normal diet.

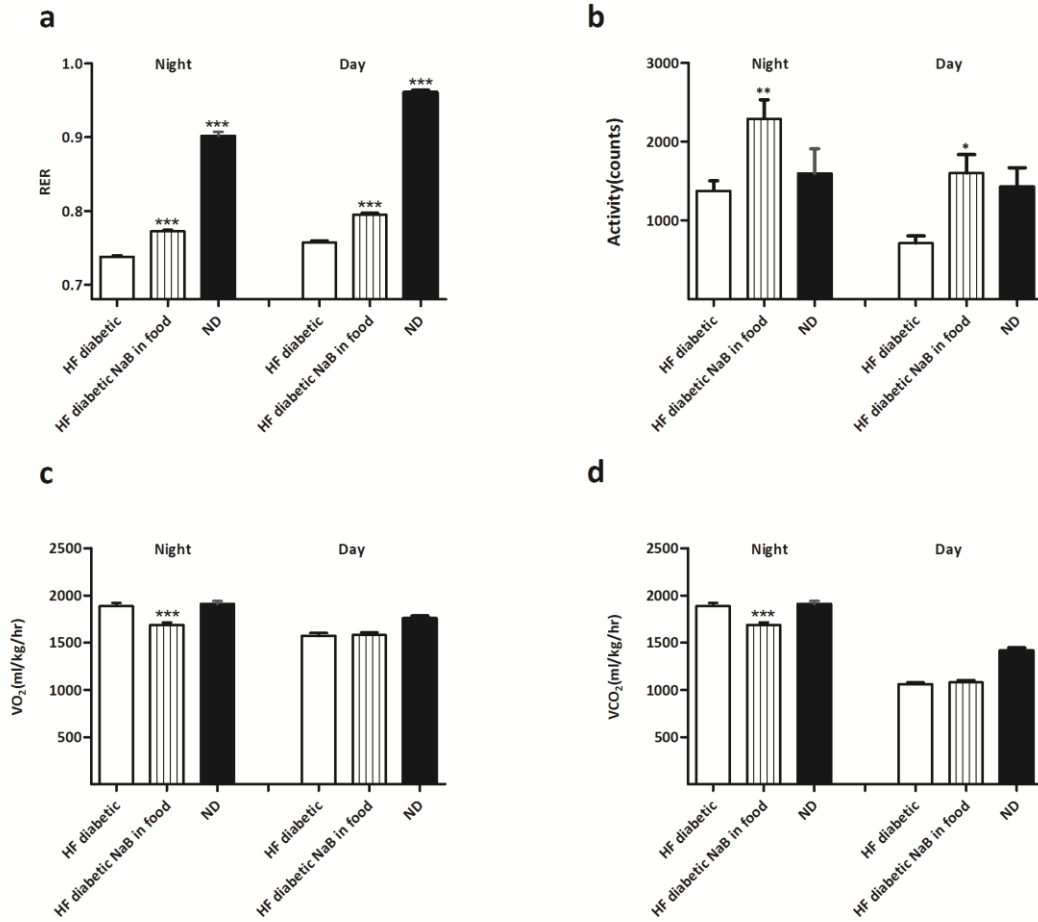

**Figure S4.** We also incorporated sodium butyrate into HF diet at 5% w/w as a supplemental experiment. The Sodium butyrate containing diet was pelleted and stored in a  $-20^{\circ}\text{C}$  freezer until usage. Energy expenditure was examined using a metabolic chamber at 17 weeks of age. **(a)** Substrate utilization is expressed by respiratory exchange ratio (RER), the ratio of  $\text{O}_2$  consumption vs  $\text{CO}_2$  exhalation volume; **(b)** Spontaneous physical activity; **(c)**  $\text{VO}_2$ ; **(d)**  $\text{VCO}_2$ . Data are mean  $\pm$  SEM, ( $n = 4$  mice per group). #, ##, ###  $p < 0.05$ ,  $p < 0.01$ ,  $p < 0.001$  vs HF diabetic control by One-way ANOVA followed by the indicated post hoc test. \*, \*\*, \*\*\*  $p < 0.05$ ,  $p < 0.01$ ,  $p < 0.001$  vs HF diabetic control by  $t$ -test. *HF diabetic*: high fat diet and streptozotocin, *HF diabetic NaB*: high fat diet and streptozotocin plus NaB, *ND*: Normal diet.

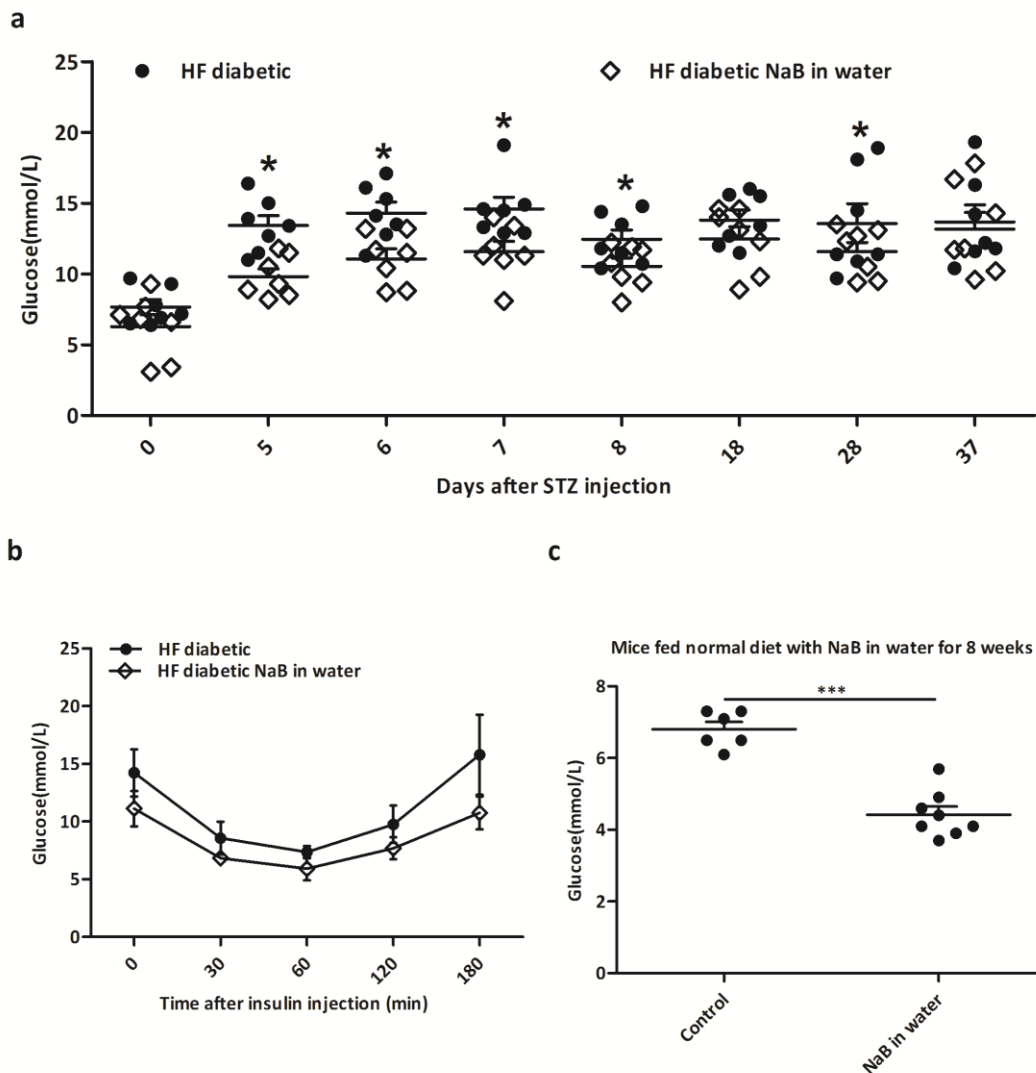

**Figure S5.** NaB in water improves fasting hyperglycemia and insulin resistance—the results in 2014. We also incorporated sodium butyrate into water at 1% as a supplemental experiment. **(a)** Glucose was tested after 6h fasting. **(b)** Insulin tolerance test. **(c)** Glucose was tested after 6h fasting. Data are mean  $\pm$  SEM, (n = 3-8 mice per group). #, ##, ###  $p < 0.05$ ,  $p < 0.01$ ,  $p < 0.001$  vs HF diabetic control by One-way ANOVA followed by the indicated post hoc test. \*, \*\*, \*\*\*  $p < 0.05$ ,  $p < 0.01$ ,  $p < 0.001$  vs HF diabetic control by *t*-test. *HF diabetic*: high fat diet and streptozotocin, *HF diabetic NaB*: high fat diet and streptozotocin plus NaB, *ND*: Normal diet.
